# Supplementary material
Source: publisher figshare collection journal article supplement (https://acs.figshare.com/ndownloader/files/25128329)
Supplement: Supplementary file 1 [file 25128329]

# Formation Damage Induced by Water-base Alumina Nanofluids during Enhanced Oil Recovery: Influence of Post-flush Salinity

*Ichhuy Ngo,<sup>1,2\*</sup> Kyuro Sasaki<sup>1</sup>, Ronald Nguele<sup>1</sup>, and Yuichi Sugai<sup>1</sup>*

<sup>1</sup>Resources Production and Safety Engineering Laboratory,  
Department of Earth Resources Engineering, Kyushu University,  
Fukuoka 819-0395, Japan.

<sup>2</sup>Energy Technology and Management Unit, Research and Innovation  
Center, Institute of Technology of Cambodia, Phnom Penh, Cambodia.

## Supporting Information

### Determination of $\text{Al}_2\text{O}_3$ concentration

The concentration of  $\text{Al}_2\text{O}_3$  nanoparticles was determined followed the Beer-Lambert principle using UV-visible spectrophotometer (model 2450, Shimadzu, Japan). Spectrophotometric reagent solution was prepared by dissolving 0.1 of 1-(2-pyridylazo)-2-naphthol (PAN) into 100 ml deionized water. A ratio of 5:1 of effluent sample to reagent solution was used (Figure S1a). The results of the light absorbance are given in Figure S1b. The obtained equation from calibration line then used to compute nanoparticles concentration within the collected sample (Figure S1c).

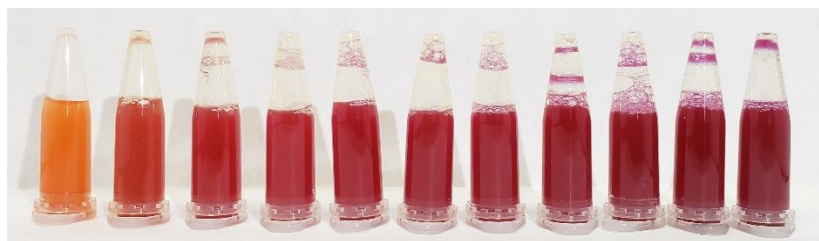

(a) Visualized color changing with  $\text{Al}_2\text{O}_3$  nanoparticles concentration (0 to 0.1 wt.%)

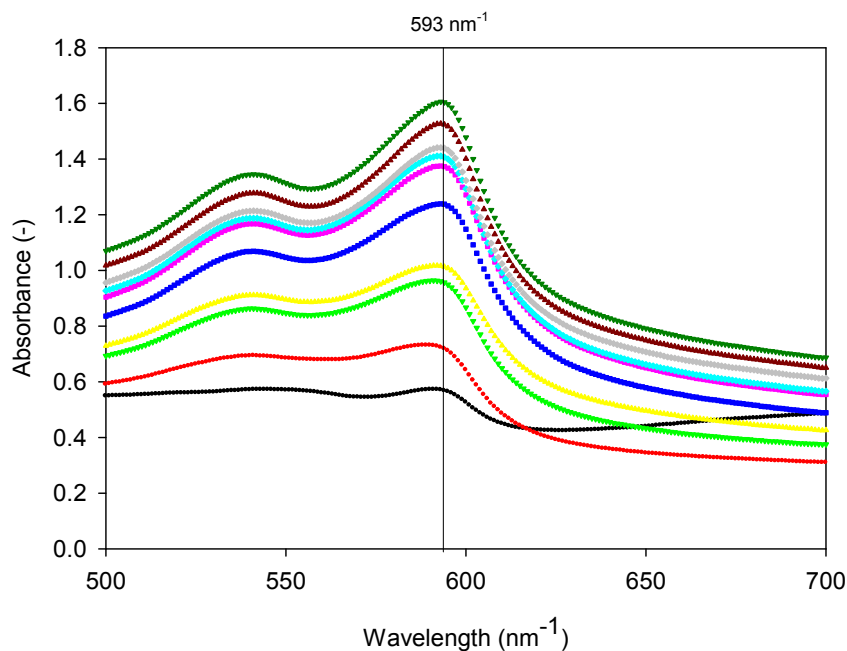

(b) Absorbance of nanofluids and PAN mixtures

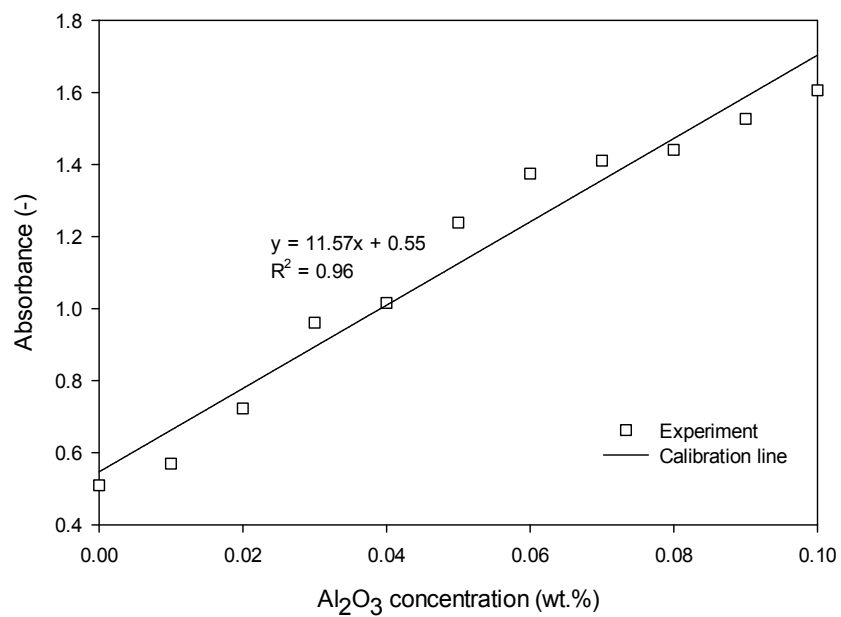

(c) Calibration of absorbance against nanoparticles concentrations

Figure S1  $\text{Al}_2\text{O}_3$  nanoparticles concentration determination
